1 **Müllerian-inhibiting substance (MIS) is both necessary and sufficient for testicular**  
2 **differentiation in Chinese soft-shelled turtle *Pelodiscus sinensis***

3 Yingjie Zhou<sup>#</sup>, Wei Sun<sup>#</sup>, Han Cai, Haisheng Bao, Yu Zhang, Guoying Qian\*, Chutian Ge\*

4

5 College of Biological and Environmental Sciences, Zhejiang Wanli University, Ningbo, 315100,

6 China

7

8 <sup>#</sup>These authors contributed equally to this work.

9 \*Corresponding authors:

10 Chutian Ge, Ph.D., College of Biological and Environmental Sciences, Zhejiang Wanli

11 University, Ningbo 315100, P. R. China. Tel: 86-574-88273390; e-mail: [cge@zwu.edu.cn](mailto:cge@zwu.edu.cn);

12 Guoying Qian, Ph.D., College of Biological and Environmental Sciences, Zhejiang Wanli

13 University, Ningbo 315100, P. R. China. Tel: 86-574-88222298; e-mail: [qiangy@zwu.edu.cn](mailto:qiangy@zwu.edu.cn).

14

15

16 **Running title: MIS drives turtle male differentiation**

17

18

19

20

21 **ABSTRACT**

22 Müllerian-inhibiting substance (*Mis*, or anti-müllerian hormone, *Amh*), a member of TGF- $\beta$   
23 superfamily, as initiator or key regulator in sexual development has been well documented in  
24 some vertebrates, especially in fish. However, its functional role has not been identified yet  
25 in reptiles. Here we characterized the *Mis* gene in Chinese soft-shelled turtle *Pelodiscus*  
26 *sinensis* (*P. sinensis*), a typical reptilian species exhibiting ZZ/ZW sex chromosomes. The  
27 mRNA of *Mis* was initially expressed in male embryonic gonads by stage 15, preceding  
28 gonadal sex differentiation, and exhibited male-specific expression pattern throughout  
29 embryogenesis. Moreover, *Mis* was rapidly up-regulated during female-to-male sex reversal  
30 induced by aromatase inhibitor letrozole. Most importantly, *Mis* loss of function by RNA  
31 interference led to complete feminization of genetic male (ZZ) gonads, suppression of the  
32 testicular marker *Sox9*, and upregulation of the ovarian regulator *Cyp19a1*. Conversely,  
33 overexpression of *Mis* in ZW embryos resulted in female-to-male sex reversal, characterized  
34 by the formation of testis structure, ectopic activation of *Sox9*, and a remarkable decline in  
35 *Cyp19a1*. Collectively, these findings provide the first solid evidence that *Mis* is both  
36 necessary and sufficient to drive testicular development in a reptilian species, *P. sinensis*,  
37 highlighting the significance of the TGF- $\beta$  pathway in reptilian sex determination.

38

39 **KEYWORDS**

40 Müllerian-inhibiting substance, testicular differentiation, sex determination, sex reversal,  
41 *Pelodiscus sinensis*

42

43

## 44 INTRODUCTION

45 In vertebrates, sex determination and gonadal differentiation generally follows the  
46 orderly expression of a series of sex-specific genes, which is triggered by primary sex-  
47 determining signal. Since the initial discovery of *Sry* in eutherian mammal (Sinclair *et al.*  
48 1990; Koopman *et al.* 1990; Koopman *et al.* 1993), several sex-determining genes have been  
49 identified in some vertebrate species, such as *Dmrt1* in chicken (Smith *et al* 2009; Lambeth *et*  
50 *al* 2014), *Dmw* in frog (Yoshimoto *et al* 2008), *Foxl2* in goat (Boulanger *et al* 2014), *Dmy*  
51 (Matsuda *et al* 2002; Nanda *et al* 2002), *Amhr2* (Kamiya *et al* 2012), *SdY* (Yano *et al* 2012),  
52 *Gsdf* (Myosho *et al* 2012), *Sox3* (Takehana *et al* 2014), *Gdf6Y* (Reichwald *et al* 2015), *Amhy*  
53 (Hattori *et al* 2012; Li *et al* 2015) and *Dmrt1* (Chen *et al* 2014) in fish. Among these genes,  
54 *Amhy*, *Amhr2* and *Gsdf* are from the transforming growth factor beta (TGF- $\beta$ ) signaling  
55 pathway, suggesting a conserved role of this pathway in the primary sex determination in  
56 fish. However, whether the TGF- $\beta$  pathway play a critical role in reptilian sex determination  
57 and differentiation has not yet been reported.

58 Müllerian inhibiting substance (*Mis*), also known as Anti-müllerian hormone (*Amh*), is a  
59 hormone-related gene belonging to TGF- $\beta$  superfamily. *Mis* gene has been found and cloned  
60 in various vertebrates of different evolutionary positions, such as mouse (King *et al* 1991),  
61 chicken (Neeper *et al* 1996), American alligator (Western *et al* 1999), medaka (Klüver *et al*  
62 2007), and tilapia (Shirak *et al* 2006). It functions through binding with the type II receptor  
63 (*AmhrII*), which in turn induces the formation of receptor polymers to activate downstream  
64 target genes (Josso *et al* 2001; Rey *et al* 2003; Johnson *et al* 2008). In mammals, *Mis* gene is  
65 expressed in Sertoli cells of embryonic testes, and responsible for the regression of the

66 Müllerian ducts, but it is not detected during the female embryonic development (Josso *et al*  
67 2001). Like mammals, chicken *Mis* is expressed only in males and induce the regression of  
68 two Müllerian ducts (Smith *et al* 1999), however, knockdown of *Mis* in chicken ZZ embryos  
69 doesn't alter gonadal development (Lambeth *et al* 2015). Despite the lack of Müllerian ducts  
70 in most teleost fish, the sexually dimorphic expression pattern of *Mis* and *AmhrII* is also  
71 detected in developing or mature gonads (Miura *et al* 2002; Yoshinaga *et al* 2004; Wu *et al*  
72 2010; Eshel *et al* 2014). Deletion of *Amhy* in Patagonian pejerrey and *Amhr2* in *Takifugu*  
73 *rubripes*, both residing on Y sex chromosome, results in male-to-female sex reversal, thus  
74 rendering these two genes as male sex-determining genes (Kamiya *et al* 2012; Hattori *et al*  
75 2012). Correlative studies in reptiles show that *Mis* exhibits male-specific embryonic  
76 expression, preceding the gonadal sex differentiation, in the red-eared slider turtle  
77 (Shoemaker *et al* 2007), painted turtle (Radhakrishnan *et al* 2017) and American alligator  
78 (Western *et al* 1999). These observations suggest a possible upstream position of *Mis* in the  
79 male pathway of reptiles, and its functional role in determining the gonadal sexual fate needs  
80 to be elucidated.

81 Chinese soft-shelled turtle *Pelodiscus sinensis* (*P. sinensis*) exhibiting ZZ/ZW genetic sex-  
82 determining system has been recently emerged as an ideal turtle model for investigating  
83 reptilian sex determination and differentiation, due to the well-established genetic  
84 modulation technique (Sun *et al* 2017; Ge *et al* 2017) and available genome resource (Wang  
85 *et al* 2013). In this study, we found that knockdown of *Mis* by RNA interference resulted in  
86 male-to-female sex reversal in *P. sinense*. Conversely, overexpression of *Mis* led to complete  
87 masculinization of female genetic turtles, indicating a both necessary and sufficient role of



88 *Mis* to drive testicular development in a reptilian species.

89

## 90 **MATERIALS AND METHODS**

### 91 **Eggs Incubation and Tissue Collection**

92 Freshly laid Chinese soft-shelled turtle (*P. sinensis*) eggs were obtained from the Dafan  
93 turtle farm (Zhejiang, China). Fertilized eggs were placed in egg incubators at 31°C, with  
94 humidity maintained at 75%-85%. During the incubation process, embryos of different  
95 developmental stages, which were identified according to criteria established by Tokita and  
96 Kuratani (Tokita *et al* 2001), were removed from eggshells, decapitated and placed in PBS for  
97 gonad-mesonephros complexes (GMCs) and whole-gonads collection. GMCs were fixed in 4%  
98 paraformaldehyde (PFA) overnight at 4°C, dehydrated through 50% ethanol, and then stored  
99 in 70% ethanol at 4°C until paraffin embedding and sectioning was performed. Gonads were  
100 broken up thoroughly and immersed in TRIzol reagent (Invitrogen, USA) for total RNA  
101 isolation. Meanwhile, all embryos from treated and control groups were treated by liquid  
102 nitrogen grinding and then stored at -80°C for genomic DNA extraction. Additionally, adult  
103 turtle testis was prepared and stored at -80°C for *Mis* cDNA cloning. All animal experiments  
104 were carried out according to a protocol approved by Zhejiang Wanli University.

### 105 **Cloning of *P. sinensis Mis* cDNA**

106 The total RNA from testis of adult turtle *P. sinensis* was extracted using TRIzol reagent  
107 (Invitrogen, USA). The first complementary DNA (cDNA) was then synthesized from 2µg of  
108 RNA by using the RevertAid™ First Strand cDNA Synthesis Kit (Fermentas, USA) following the  
109 manufacturer's instructions. 5' and 3' RACE was carried out according to the manufacturer's

110 protocol of SMART RACE cDNA Amplification kit (Clontech, Takara, Japan). The sequences of  
111 primers for RACE are as follows: *Mis*-GSPF1: 5'-CGCTCTCCACCCGCATCCCCGACT-3'; *Mis*-  
112 GSPF2: 5'-GGTTTCTGCCTCGCTCTTCAGTCCT-3'; *Mis*-GSPR1: 5'-TACTGCAAAGCGACTC  
113 CTAGCAC-3'; *Mis*-GSPR2: 5'-TGGCAGACATTTCTCTTAGGGCTT-3'. The PCR products were  
114 extracted from agarose gel using MiniBEST Agarose Gel DNA Extraction Kit (Takara, Japan)  
115 based on manufacturer's instructions, and cloned into pMD18-T (Takara) vector and then  
116 transformed into *E.coli* DH5 $\alpha$  for sequencing. Alignment of deduced amino acid sequences  
117 were carried out by Clustal X software, and the phylogenetic tree was constructed using the  
118 Neighbour-Joining(N-J) method in Mega 6.0 software. The sequences of amino acid used in  
119 the phylogenetic analysis were obtained from GenBank (NCBI).

#### 120 **Aromatase Inhibitor letrozole treatment**

121 A non-steroidal aromatase inhibitor letrozole (Sigma, USA) were administered to eggs at  
122 developmental stage 15 and 16 (gonadal differentiation normally begins from late stage 17).  
123 The letrozole was dissolved in 95% ethanol at a concentration of 20  $\mu\text{g}/\mu\text{l}$ , and 10  $\mu\text{l}$  of drug  
124 was topically applied to the eggshell in the region adjacent to the embryo. Controls were  
125 treated with 10  $\mu\text{l}$  of 95% ethanol. Gonad-mesonephros complexes were dissected from  
126 treated and control embryos at stage 27 for histology and immunohistochemistry. Gonads  
127 were separated from adjacent mesonephros at stage 17, 21 and 25, and stored for qRT-PCR  
128 analysis.

#### 129 **Construction of LV-*Mis*-shRNA Vector System**

130 The lentivirus vector was used to deliver shRNAs specifically targeting *Mis* mRNA into  
131 living embryos of Chinese soft-shell turtle before sexual differentiation, to knockdown

132 endogenous *Mis* transcripts. The designed shRNA construct contained a unique 21 nt double-  
133 stranded *Mis* sequence that presented as an inverted complementary repeat, a loop  
134 sequence (5'-CTCGAG-3') and the RNA Plo-II terminator (5'-TTTTTT-3'). Annealed  
135 oligonucleotides were ligated into pGP-U6 (GenePharma, Shanghai, China) between the *Bbs*  
136 and *Xho* sites by T4 DNA ligase (TaKaRa) to produce pGP-U6-*Mis*-shRNA. The pGP-U6-*Mis*-  
137 shRNA construct was digested with *AgeI-EcoRI* and inserted into the *EcoRI* site of pGLV-U6-  
138 GFP (GenePharma). The lentivirus vector can also express green fluorescent protein (GFP),  
139 providing rapid visual assessment of the viral infection efficiency of embryos. The  
140 recombinant vector pGLV-GFP-*Mis*-shRNA was termed as LV-*Mis*-shRNA. The negative control  
141 vector (pGLV-GFP-NC-shRNA, termed as LV-NC-shRNA) contained a nonsense shRNA insert in  
142 order to control any effects caused by non-RNAi mechanisms. The sequence of the shRNA  
143 are as follows: *Mis*-shRNA (5'-GGTGCTGCATCTTGAGGAAGT-3').

144 For the generation of lentivirus, 293T producer cells were transfected with optimized  
145 packaging plasmids (pGag/Pol, pRev and pVSV-G) along with pGLV-*Mis*-shRNA or pGLV-NC-  
146 shRNA expression clone constructs by lipofectamine. 24 h post transfection, the transfection  
147 mix was replaced by a fresh culture medium (without antibiotics). The virus-containing  
148 supernatant was harvested 72 h post transfection, cleared by centrifugation (3000 rpm/min,  
149 15 min, and 4°C), and then filtered through a 0.45 µm filter (Millipore, USA). Viruses were  
150 titrated by adding serial dilutions to fresh 293 T and assessed using GFP expression after 48  
151 h. Viral titres of approximately  $1 \times 10^9$  infectious units/ml were obtained. Lentivirus aliquots  
152 were stored at -80 °C before infection of turtle embryos.

### 153 **Construction of LV-*Mis*-OE Vector System**

154 Total RNA was isolated from testis of adult Chinese soft-shelled turtle and then reverse  
155 transcription was performed to prepare the cDNA. The full-length open reading frame  
156 (1401bp) of *P. sinensis Mis* gene was PCR amplified from cDNA using forward primer 5'-  
157 CCCCAAATTGTAGAGGCCGAACC-3' and reverse primer 5'-TGAGGGCAGGGCAGAGGAGG-3'. The  
158 PCR product was digested with *EcoRI* and cloned to pGLV-EF1a-GFP (LV-4, GenePharma). The  
159 recombinant vector pGLV-GFP-*Mis* was named LV-*Mis*. The empty vector pGLV-GFP-empty  
160 was constructed as a negative control (LV-empty). High quality proviral DNA was used to  
161 transfect 293T cells. Virus propagation was carried out as described above.

## 162 **Infection of Turtle Embryos**

163 A high-titre virus of LV-*Mis*-shRNA or LV-*Mis*-OE (at least  $1 \times 10^8$  infectious units/ml, 5  $\mu$ l per  
164 embryo) was injected into turtle embryos at stage 14 before the time point (stage 15) that  
165 *Mis* began to exhibit a highly male(ZZ)-specific expression pattern, using a fine metal  
166 Hamilton needle (diameter: 0.5 mm). Each 200 eggs were injected in two treated groups, and  
167 200 control eggs were injected with scrambled control virus of LV-NC-shRNA or LV-empty.  
168 Eggs were sealed with parafilm and incubated for the indicated time points (stage 25 and  
169 27). Embryos showing robust GFP fluorescence in the urogenital system were chosen for  
170 further analysis.

## 171 **Embryo sexing**

172 The genomic DNA was extracted from all tested embryos, and amplification of sex  
173 chromosome-specific DNA fragment was subsequently performed to identify the genetic sex  
174 of each embryo, which was well documented previously (Litterman *et al* 2017). PCR products  
175 were visualized on 1% agarose gels. The lower bands represent Z-linked amplified fragments,

176 and higher bands represent W-linked sex-diagnostic fragments (Fig.S3). The primer  
177 sequences for PCR are as follows: *Setd1b* (F: 5'-GATCGAATTACATCCTGC CT-3', R:5'-TAAATTAG  
178 GACTGGAAGACACC-3').

### 179 **Quantitative RT-PCR**

180 Total RNA was extracted from embryonic gonads of different developmental stages, and  
181 subsequently synthesized for cDNA (methodology found above). Quantification of gene  
182 transcript levels in embryonic gonads of all treated and control groups was measured by qRT-  
183 RCR. In all PCR reactions, *Gapdh* was used as a reference gene. The qRT-RCR reaction was  
184 carried out using SYBR<sup>®</sup> PrimeScript<sup>™</sup> II (Takara) in a Bio-Rad iCycler system. After  
185 normalization with *Gapdh*, relative RNA levels in samples were calculated using the  
186 comparative threshold cycle (Ct) method. Each RNA sample was analyzed in triplicate  
187 determinations. The primers sequences for PCR are as follows: *Gapdh* (F: 5'-GGC TTT CCG  
188 TGT TCC AAC TC-3', R:5'-GAC AAC CTG GTC CTC CGT GTA TC-3'); *Mis*(F:5'-CGG CTA CTC CTC  
189 CCA CAC G-3', R:5'-CCT GGC TGG AGT ATT TGA CGG-3'); *Cyp19a1*(F:5'-TCG TGG CTG TAC AAG  
190 AAA TAC GAA-3', R:5'-CCA GTC ATA TCT CCA CGG CTC T-3') ; *Sox9*(F:5'-TTT CCG ACC GCT AAA  
191 ACG ACA C-3', R:5'-CTC CGC TGA CCA AAA CTT AGC CC-3').

### 192 **Immunofluorescence**

193 Gonad-mesonephros complexes (GMCs) were fixed in 4% PFA overnight at 4°C, dehydrated  
194 in graded ethanol, then embedded in paraffin wax and sectioned. Paraffin sections (5-6 μm)  
195 were deparaffinized and rehydrated prior to immersion in 10 mM sodium citrate buffer for  
196 20 min at a sub-boiling temperature (96-99°C) for antigen retrieval. After blocked for 1 h in  
197 blocking solution (10% Normal Donkey Serum, 3% BSA (albumin from bovine serum), and

198 0.3%Triton X-100) at room temperature, sections were covered with primary antibodies and  
199 incubated overnight at 4°C, followed by washing (three times, 10 min each time) in washing  
200 solution (1% Normal Donkey Serum, 3% BSA, 0.3% Triton X-100), secondary antibodies  
201 incubation (2 h, room temperature, dark environment) and washing (same as above). The  
202 primary antibodies used in this analysis included rabbit anti-MIS (1:200, produced privately  
203 through Sangon Biotech), rabbit anti-VASA (1:500, Abcam), rabbit anti-SOX9 (1:500,  
204 Millipore) and mouse anti-CTNNB1 (1:250, Sigma). Primary antibodies were detected using  
205 secondary antibodies AlexFluor 488 donkey anti-rabbit IgG or AlexFluor 594 donkey anti-  
206 rabbit IgG, AlexFluor 488 donkey anti-mouse IgG (1:250, Invitrogen). Nuclei were stained  
207 with DAPI (286 nmol/L, Sigma) and then washed with 0.01 mol/L PBS (three times, 5 min  
208 each time). Fluorescence signals were observed under a fluorescence microscope (Ti-E,  
209 nickon) or confocal microscope (A1 Plus, Nickon).

## 210 **Statistical Analyses**

211 Each experiment was independently repeated at least three times. All data was expressed  
212 as the means  $\pm$  S.D. and analyzed by One-Way Duncan test and ANOVA using the SPSS  
213 software. For all analyses, a *P*-value < 0.05 was regarded as statistically significant (\*, *P*<0.05;  
214 \*\*, *P*<0.01; \*\*\*, *P*<0.001).

215

## 216 **RESULTS**

### 217 **Characterization of *Mis* gene in *P. sinensis***

218 The full-length coding sequence of *P. sinensis Mis* was obtained by 5' and 3' RACE. The  
219 complete cDNA sequence of *P. sinensis Mis* was 3232 base pairs (bp) (accession number

220 KY964412), with a 997 bp 5' untranslated region (UTR), an open reading frame (ORF) of 1401  
221 bp, and an 834 bp 3' UTR (Supplementary Fig. 1A). The deduced MIS protein comprised 466  
222 amino acids, which includes two characteristic functional domains of the TGF- $\beta$  superfamily:  
223 AMH-N and TGF- $\beta$  domain with ten canonical cysteine residues. The amino acid sequence of  
224 *P. sinensis* MIS shared 47%, 21.06%, 19.25%, 32.22%, 18.55%, and 11.30% identity with that  
225 of the red-eared slider turtle (*Trachemys scripta*), human (*Homo sapiens*), mice (*Mus*  
226 *musculus*), chicken (*Gallus gallus*), frog (*Xenopus laevis*) and zebra fish (*Danio rerio*),  
227 respectively (Supplementary Fig. 1B). The phylogenetic tree also showed that *P. sinensis* MIS  
228 was evolutionarily most closely related to the red-eared slider turtle, followed by chicken and  
229 mice, and distantly related to fish (Supplementary Fig. 1C).

### 230 **Sexually dimorphic expression of *Mis* in gonads of *P. sinensis***

231 To find out whether *Mis* is involved in testicular development in *P. sinensis*, we first  
232 analyzed the expression profile of *Mis* in embryonic gonads of both sexes at different  
233 developmental stages. RNA-seq showed that *Mis* transcripts were detected and already  
234 expressed highly in the male gonads as early as stage 15. It exhibited male-specific  
235 embryonic expression during the critical sex determination period (stage 15 to 19), with  
236 female gonads showing extremely low expression level (Fig. 1A). The sex-dependent  
237 expression was further confirmed by qRT-PCR (Fig. 1B). We also examined the cellular  
238 localization of MIS protein in embryonic gonads at stage 17, when the gonads were still  
239 morphologically undifferentiated and appeared identical between sexes.  
240 Immunofluorescence showed that MIS protein was robustly expressed in Sertoli cells of the  
241 medullary sex-cords in male embryonic gonads, whereas the expression signals were

242 undetectable in female gonads (Fig. 1C).

### 243 **Upregulation of *Mis* in ZW gonads during female-to-male sex reversal**

244 Treatment of aromatase inhibitor (AI) letrozole at early stages of sex determination (stage  
245 15 and 16) induced ZW turtle embryos to develop towards the male phenotype (Fig. 2A).  
246 Tails of control ZW embryos were not beyond the hem of calipash, shorter than those in  
247 control ZZ embryos. However, tails of AI-treated ZW embryos became longer, with male  
248 genitals exposed from the cloacal orifice in most cases. The gonadal histological analysis  
249 showed that AI-treated ZW embryos exhibited medullary testis-cords and degenerated  
250 cortex (Fig. 2A). Furthermore, the testicular marker SOX9 was induced to be robustly  
251 expressed in medulla of the masculinized ZW gonads (Fig. 2B). These observations  
252 demonstrated that AI treatment at early stages indeed induced female-to-male sex reversal  
253 in *P. sinensis*.

254 We next analyzed the expression changes of *Mis* in AI-induced female-to-male sex reversal  
255 to further determine whether *Mis* expression is associated with the testicular differentiation.  
256 qRT-PCR showed that *Mis* expression in ZW gonads increased dramatically in response to the  
257 female-to-male sex reversal (Fig. 2C). Intriguingly, the upregulation of *Mis* responded as  
258 early as stage 17, when the gonads were still morphologically undifferentiated between  
259 sexes, indicating that *Mis* is an early responder to the induction of male differentiation in *P.*  
260 *sinensis* (Fig. 2C).

### 261 **Feminization of ZZ turtle embryos with *Mis* knockdown**

262 To investigate the function of *Mis* on male development of *P. sinensis*, we first established



263 the *Mis* deficient turtle model by introducing shRNA against *Mis* in ovo at stage 14. qRT-PCR  
264 showed that the mRNA expression of *Mis* was >80% decreased in ZZ gonads from the  
265 embryos exhibiting global GFP reporter expression after LV-*Mis*-shRNA treatment than  
266 control ZZ gonads (LV-NC-shRNA) (Supplementary Fig. 2A, B). Phenotype of *Mis* deficient ZZ  
267 gonads were subsequently examined by gonadal histology and immunofluorescence. Control  
268 ZZ embryonic tails were straight and beyond the hem of calipash, but ZW embryonic tails  
269 were relative shorter and hid under the calipash (Fig. 3A, C). Control ZZ gonads were short  
270 and cylindrical, while ZW gonads were long and flat (Fig. 3D, F). In ZZ embryos with *Mis*  
271 knockdown, tails became curved and did not exceed the hem of calipash, and gonads  
272 became elongated and flat, exhibiting female-like morphology (Fig. 3B, E). Histological  
273 analysis of gonadal sections showed that the control ZZ gonads of stage 25 possessed a  
274 dense medulla with seminiferous cords and a degenerative cortex (Fig. 3G). Whereas control  
275 ZW gonads had a vacuolated medulla and a well-developed outer cortex (Fig. 3I). However,  
276 the *Mis* deficient ZZ gonads were completely feminized, characterized by a thickened cortex  
277 and a highly degenerated medulla (Fig. 3H). VASA staining showed that germ cells mainly  
278 located in medullary cords of control ZZ gonads, whereas control ZW gonads exhibited outer  
279 cortical distribution pattern of germ cells (Fig. 3J, L). VASA-positive germ cells in *Mis* deficient  
280 ZZ gonads displayed a female-like distribution, mainly enriched in the thickened cortex (Fig.  
281 3K). Statistically, 32.8% (21 of 64) of genetic male embryos with *Mis* knockdown showed  
282 male-to-female sex reversal (Table 1).

283 To further confirm the activation of the female developmental pathway in *Mis* deficient ZZ  
284 embryos, we analyzed the expression changes of testicular differentiation marker *Sox9* and

285 ovarian development regulator *Cyp19a1*. At the mRNA level, significant down-regulation of  
286 *Sox9*, and remarkable up-regulation of *Cyp19a1* were observed in ZZ gonads of stage 25 with  
287 *Mis* knockdown relative to controls (Fig. 4A, B). At the protein level, the expression signals of  
288 SOX9 was detected specifically in the nuclei of Sertoli cells in control ZZ gonads, but it was  
289 not observed in control ZW gonads. SOX9 expression in *Mis* deficient ZZ gonads was sharply  
290 reduced and almost disappeared (Fig. 4C). These results suggested that loss of *Mis* in ZZ  
291 turtle embryos led to male-to-female sex reversal.

### 292 **Masculinization of ZW turtle embryos overexpressing *Mis***

293 The ectopic expression of *Mis* in ZW embryos was performed to determine if *Mis* was  
294 sufficient to initiate primary male differentiation in *P. sinensis*. *Mis*-overexpressing embryos  
295 were generated by injection of lentivirus vector carrying the *Mis* ORF into turtle eggs at  
296 stage 14 (Supplementary Fig. 2C). In ZW embryos overexpressing *Mis*, the tails became  
297 curved, and the gonads exhibited a short cylindrical structure, similar with control ZZ gonads  
298 (Fig. 5A-F). H&E staining of gonadal sections showed that ZW gonads overexpressing *Mis*  
299 exhibited a well-developed medulla with seminiferous cord-like structure (Fig. 5G-I). In LV-  
300 *Mis*-OE treated group, 25.8% (16 of 62) of ZW embryos showed female-to-male sex reversal  
301 (Table 1). Upregulation of *Sox9* and downregulation of *Cyp19a1* were observed in ZW gonads  
302 with *Mis* overexpression, determined by qRT-PCR (Fig. 6A, B). Ectopic activation of SOX9  
303 protein in treated ZW gonads was further confirmed by immunofluorescence. Induced SOX9  
304 expression was localized in the nuclei of Sertoli cells within the masculinized region (testis  
305 cords) in ZW gonads following *Mis* overexpression, but it seemed a little bit lower compared  
306 to control males (Fig. 6C). These data indicated that overexpression of *Mis* caused obvious

307 masculinization of genetic female (ZW) embryos in *P. sinensis*.

308

## 309 **DISCUSSION**

310 The conserved roles of TGF- $\beta$  signaling pathway in sex determination have been recently  
311 functionally characterized in teleost fish, through the discoveries of three sex-determining  
312 genes, *Amhr2*, *Gsdf* and *Amhy* (Kamiya *et al* 2012; Myosho *et al* 2012; Hattori *et al* 2012). In  
313 this study, we provide the first solid evidence that *Mis* is both necessary and sufficient to  
314 induce male development in a reptilian species, *P. sinensis*, highlighting the significance of  
315 the TGF- $\beta$  pathway in reptilian sex determination and sexual differentiation.

316 In this study, we found that the male gonad-specific expression of *P. sinensis Mis* has  
317 already appeared as early as stage 15, clearly preceding the onset of gonadal differentiation,  
318 indicating an upstream role of *Mis* in the male pathway of *P. sinensis*. This finding is  
319 consistent with previous studies in the red-eared slider turtle (Shoemaker *et al* 2007),  
320 painted turtle (Radhakrishnan *et al* 2017) and American alligator (Western *et al* 2012). In *T.*  
321 *scripta* with temperature-dependent sex determination, *Mis* expression in gonad was  
322 significantly higher at male- than female-producing temperature from stage 16 onwards, the  
323 beginning of temperature-sensitive sex determination period (Shoemaker *et al* 2007;  
324 Shoemaker-Daly *et al* 2010; Czerwinski *et al* 2016). These correlative studies strongly imply  
325 the conserved role of *Mis* in male development across reptilian species.

326 In non-mammalian vertebrates, estrogen and its synthetase aromatase play an important  
327 regulatory role in early gonadal sex differentiation. Exogenous estrogen and aromatase

328 inhibitor (AI) can override the effects of primary sex-determination signals, including genetic  
329 and environmental factors, if applied during critical developmental periods (Crews 1994a;  
330 Crews 1994b; Smith *et al* 2003; Schulz *et al* 2007; Kobayashi *et al* 2008; Ge *et al* 2017;).  
331 Treatment of AI onto chicken ZW eggs was able to induce upregulation of *Dmrt1*, a Z  
332 chromosome-linked master sex-determining gene, ultimately resulting in female-to-male sex  
333 reversal (Smith *et al* 2003). It has been proposed that exogenous steroid hormones may  
334 redirect the differentiation direction of gonads by interacting with the sex-specific genes,  
335 especially those located on the upstream of sexual development pathway (Matsumoto *et al*  
336 2012). In this study, *Mis* expression in *P. sinensis* ZW gonads responded rapidly to the AI-  
337 induced female-to-male sex reversal, prior to the sexual differentiation. The finding is  
338 consistent with the studies on zebrafish that reported the estrogen-induced alteration in *Mis*  
339 expression had already appeared at early stages of gonadal differentiation (Schulz *et al*  
340 2007). These observations suggest that *Mis* is associated with testicular differentiation, and  
341 likely lies on the upstream of male pathway in *P. sinensis*.

342 To date, any member of TGF- $\beta$  signaling pathway has not been functionally identified in  
343 reptiles, including turtles. Using an *in ovo* turtle gene-modulating approach developed  
344 previously (Sun *et al* 2017; Ge *et al* 2017), we found that knockdown of *Mis* led to complete  
345 feminization of genetic male (ZZ) gonads, including gonadal morphology and germ cell  
346 distribution pattern, as well as downregulation of testicular marker *Sox9* and upregulation of  
347 ovarian regulators *Cyp19a1*, indicating that *Mis* gene is essential for male gonadal  
348 differentiation in *P. sinensis*. This is similar to the functional roles of *Amhy*, the Y  
349 chromosome-linked duplicated copy of *Amh*, in two teleost fish (Hattori *et al* 2012; Li *et al*

2015). In Patagonian pejerrey, *Amhy* knockdown in XY embryos caused upregulation of  
*Cyp19a1a* and development of ovaries (Hattori *et al* 2012). Likewise, knockdown of *Amhy* in  
XY Nile Tilapia resulted in ovarian differentiation (Li *et al* 2015). Conversely, ectopic  
expression of *Mis* in *P. sinensis* ZW gonads induced the formation of sex cord-like structures  
with robust expression of SOX9 protein, implying that *Mis* is sufficient to initiate testicular  
differentiation in *P. sinensis*. As expected, the genetic female (XX) gonads overexpressing  
*Amhy* developed into testis in Nile Tilapia (Li *et al* 2015). Recently, we found the same loss-  
of- and gain-of-functional role of *Mis* in *T. scripta*, a turtle species with temperature-  
dependent sex determination (data not published), suggesting a conserved role for *Mis* in sex  
determination of turtle species, even with different sex determination systems. Our previous  
studies on *P. sinensis* have reported that the onset of *Mis* expression preceded *Sox9*, but later  
than *Dmrt1*, and *Dmrt1* overexpression caused an elevated expression of *Mis* and *Sox9* in ZW  
*P. sinensis* (Sun *et al* 2017). In this study, ectopic activation of *Sox9* occurred in response to  
*Mis* overexpression, which means that *Mis* could regulate *Sox9* in *P. sinensis*. *Mis* expression  
was also earlier than *Sox9* in chicken (Oreal *et al* 1998) and American alligators (Western *et al* 1999),  
however, the genetic position between *Mis* and *Sox9* was opposite in mammals. All  
these findings indicate that *P. sinensis* *Mis* acts as a positive regulator in the primary male  
sexual differentiation, and the network of *Dmrt1-Mis-Sox9* might be the effective component  
of testicular development in *P. sinensis*. Despite the necessary and sufficient role, *Mis* and  
*Dmrt1* seems not the master sex-determining gene, as both genes do not localize on the sex  
chromosome. Further investigation will be required to identify the master sex-determining  
gene in *P. sinensis*. Understanding the genetic link between the putative master gene and

372 male or female effective components (such as *Mis*) may finally unravel the full mechanism of  
373 sex determination and differentiation in *P. sinensis*.

374 In conclusion, we demonstrate for the first time in reptiles that *Mis* is both necessary and  
375 sufficient to drive testicular development, thereby operating as an upstream regulator in the  
376 male pathway of Chinese soft-shelled turtle *Pelodiscus sinensis*. This study highlights a  
377 conserved role of a member of TGF- $\beta$  signaling pathway, *Mis*, in reptilian sex determination  
378 and gonadal differentiation, and the direct upstream regulator of *Mis* needs to be identified.

379

## 380 **ACKNOWLEDGEMENTS**

381 We thank Mr. Wei Song and Caisheng Wang for turtle eggs collection and incubation. This  
382 study was supported by the National Natural Science Foundation of China (31872960),  
383 National Key Research and Development Program (2018YFD0900203), Natural Science  
384 Foundation of Zhejiang Province for Distinguished Young Scholars (LR19C190001), the Basic  
385 Public Welfare Research Projects of Zhejiang Province (LGN19C190005) , the Major  
386 Agricultural Project of Ningbo (2017C110012), the Zhejiang Provincial Project of Selective  
387 Breeding of Aquatic New Varieties (2016C02055-4), Zhejiang Provincial Top Key Discipline of  
388 Biological Engineering (KF2016005, ZS2018008) . C.G. and G.Q. conceived and designed the  
389 study; Y.Z., W. S., H. C., H.B. and Y.Z. performed the experiments; Y.Z. and W.S. analyzed data;  
390 Y.Z., W.S. and C.G. co-wrote the manuscript. All authors read and approved the manuscript.

## 391 **LITERATURE CITED**

392 Boulanger, L., M. Pannetier, L. Gall, A. Allais-Bonnet, M. Elzaiat, D. Le Bourhis *et al.*,

- 393 (2014) FOXL2 is a female sex-determining gene in the goat. *Curr. Biol.* **24**: 404-408.
- 394 Chen, S., G. Zhang, C. Shao, Q. Huang, G. Liu *et al.*, (2014) Whole-genome sequence of a  
395 flatfish provides insights into ZW sex chromosome evolution and adaptation to a benthic  
396 lifestyle. *Nat. Genet.* **46**: 253-260.
- 397 Czerwinski, M., A. Natarajan, L. Barske, L. L. Looger, B. Capel, (2016) A timecourse analysis of  
398 systemic and gonadal effects of temperature on sexual development of the red-eared slider  
399 turtle *Trachemys scripta elegans*. *Dev. Biol.* **420**: 166-177.
- 400 Crews, D., (1994) Temperature, steroids and sex determination. *J. Endocrinol.* **142**: 1-8.
- 401 Crews, D., J. M. Bergeron, (1994) Role of reductase and aromatase in sex determination in  
402 the red-eared slider (*Trachemys scripta*), a turtle with temperature-dependent sex  
403 determination. *J. Endocrinol.* **143**: 279-289.
- 404 Eshel, O., A. Shirak, L. Dor, M. Band, T. Zak *et al.*, (2014) Identification of male-specific Mis  
405 duplication, sexually differentially expressed genes and microRNAs at early embryonic  
406 development of Nile tilapia (*Oreochromis niloticus*). *BMC Genomics* **15**: 774.
- 407 Ge, C., J. Ye, Y. Zhang, W. Sun, Y. Sang *et al.*, (2017) Dmrt1 induces the male pathway in a  
408 turtle species with temperature-dependent sex determination. *Development* **144**: 2222-  
409 2233.
- 410 Hattori, R. S., Y. Murai, M. Oura, S. Masuda, S. K. Majihi *et al.*, (2012) A Y-linked anti-  
411 Mullerian hormone duplication takes over a critical role in sex determination. *Proc. Natl.*  
412 *Acad. Sci. USA.* **109**: 2955-2959.
- 413 Josso, N., N. di Clemente, L. Gouédard, (2001) Anti-Müllerian hormone and its receptors.  
414 *Mol. Cell Endocrinol.* **179**: 25-32.

- 415 Johnson, P. A., T. R. Kent, M. E. Urlick, and J. R. Giles, (2008) Expression and regulation of anti-  
416 Müllerian hormone in an oviparous species, the hen. *Biol. Reprod.* **78**: 13-19.
- 417 Koopman, P., A. Münsterberg, B. Capel, N. Vivian, and R. Lovell-Badge, (1990) Expression of a  
418 candidate sex-determining gene during mouse testis differentiation. *Nature* **348**: 450-452.
- 419 Koopman, P., J. Gubbay, N. Vivian, P. Goodfellow, and R. Lovell-Badge, (1991) Male  
420 development of chromosomally female mice transgenic for Sry. *Nature* **351**: 117-21.
- 421 Kamiya, T., W. Kai, S. Tasumi, A. Oka, T. Matsunaga *et al.*, (2012) A trans-species missense SNP  
422 in *Misr2* is associated with sex determination in the tiger pufferfish, *Takifugu rubripes* (fugu).  
423 *PLoS Genet.* **8**: e1002798.
- 424 King, T. R., B. K. Lee, R. R. Behringer, and E. M. Eicher, (1991) Mapping anti-Müllerian  
425 hormone (*Mis*) and related sequences in the mouse: identification of a new region of  
426 homology between MMU10 and HSA19p. *Genomics* **11**: 273-283.
- 427 Kobayashi, T., H. Kajiura-Kobayashi, G. Guan, and Y. Nagahama, (2008) Sexual dimorphic  
428 expression of *DMRT1* and *Sox9a* during gonadal differentiation and hormone-induced sex  
429 reversal in the teleost fish Nile tilapia (*Oreochromis niloticus*). *Dev. Dyn.* **237**: 297-306.
- 430 Miura, T., C. Miura, Y. Konda, and K. Yamauchi, (2002) Spermatogenesis-preventing substance  
431 in Japanese eel. *Development* **129**: 2689-2697.
- 432 Klüver, N., F. Pfennig, I. Pala, K. Storch, M. Schlieder *et al.*, (2007) Differential expression of  
433 anti-Müllerian hormone (*Mis*) and anti-Müllerian hormone receptor type II (*MisrII*) in the  
434 teleost medaka. *Dev. Dyn.* **236**: 271-281.
- 435 Lambeth, L. S., K. Ayers, A. D. Cutting, T. J. Doran, A. H. Sinclair *et al.*, (2015) Anti-Müllerian  
436 hormone is required for chicken embryonic urogenital system growth but not sexual



437 differentiation. *Biol. Reprod.* **93**: 1-12.

438 Lambeth, L. S., C. S. Raymond, K. N. Roeszler, A. Kuroiwa, T. Nakata *et al.*, (2014) Over-  
439 expression of DMRT1 induces the male pathway in embryonic chicken gonads. *Dev. Biol.* **389**:  
440 160-172.

441 Li, M., Y. Sun, J. Zhao, H. Shi, S. Zeng *et al.*, (2015) A tandem duplicate of anti-Müllerian  
442 hormone with a missense SNP on the Y chromosome is essential for male sex determination  
443 in Nile Tilapia, *Oreochromis niloticus*. *PLoS Genet.* **11**: e1005678.

444 Litterman, R., S. Radhakrishnan, J. Tamplin, R. Burke, C. Dresser *et al.*, (2017) Development of  
445 sexing primers in *Glyptemys insculpta* and *Apalone spinifera* turtles uncovers an XX/XY sex-  
446 determining system in the critically-endangered bog turtle *Glyptemys muhlenbergii*. *Conserv.*  
447 *Genet. Resour.* **9**: 651-658.

448 Matsuda, M., Y. Nagahama, A. Shinomiya, T. Sato, C. Matsuda *et al.*, (2002) DMY is a Y-  
449 specific DM-domain gene required for male development in the medaka fish. *Nature* **417**:  
450 559-563.

451 Myosho, T., H. Otake, H. Masuyama, M. Matsuda, Y. Kuroki *et al.*, (2012) Tracing the  
452 emergence of a novel sex-determining gene in medaka, *Oryzias luzonensis*. *Genetics* **191**:  
453 163-170.

454 Matsumoto, Y., and D. Crews, (2012). Molecular mechanisms of temperature-dependent sex  
455 determination in the context of ecological developmental biology. *Mol. Cell. Endocrinol.* **354**:  
456 103-110.

457 Nanda, I., M. Kondo, U. Hornung, S. Asakawa, C. Winkler *et al.*, (2002) A duplicated copy of  
458 DMRT1 in the sex-determining region of the Y chromosome of the medaka, *Oryzias latipes*.

459 *Proc. Natl. Acad. Sci. USA.* **99**: 11778-11783.

460 Neeper, M., R. Lowe, S. Galuska, K. J. Hofmann, R. G. Smith *et al.*, (1996) Molecular cloning of  
461 an avian anti-Müllerian hormone homologue. *Gene* **176**: 203-209.

462 Oreal, E., C. Pieau, M. G. Mattei, N. Josso, J. Y. Picard *et al.*, (1998) Early expression of MIS in  
463 chicken embryonic gonads precedes testicular SOX9 expression. *Dev. Dyn.* **212**: 522-532.

464 Reichwald, K., A. Petzold, P. Koch, B. R. Downie, N. Hartmann *et al.*, (2015) Insights into Sex  
465 Chromosome Evolution and Aging from the Genome of a Short-Lived Fish. *Cell* **163**: 1527-  
466 1538.

467 Rey, R., C. Lukas-Croisier, C. Lasala and P. Bedecarrás, (2003) MIS/MIS: what we know already  
468 about the gene, the protein and its regulation. *Mol. Cell Endocrinol.* **211**: 21-31.

469 Radhakrishnan, S., R. Literman, J. Neuwald, A. Severin, and N. Valenzuela, (2017)  
470 Transcriptomic responses to environmental temperature by turtles with temperature-  
471 dependent and genotypic sex determination assessed by RNAseq inform the genetic  
472 architecture of embryonic gonadal development. *PLOS One* **12**: e0172044.

473 Sinclair, A. H., P. Berta, M. S. Palmer, J. R. Hawkins, B. L. Griffiths *et al.*, (1990) A gene from  
474 the human sex-determining region encodes a protein with homology to a conserved DNA-  
475 binding motif. *Nature* **346**: 240-244.

476 Smith, C. A., M. Katz, and A. H. Sinclair, (2003) DMRT1 is upregulated in the gonads during  
477 female-to-male sex reversal in ZW chicken embryos. *Biol. Reprod.* **68**: 560-570.

478 Smith, C. A., K. N. Roeszler, T. Ohnesorg, D. M. Cummins, P. G. Farlie, *et al.*, (2009) The avian  
479 Z-linked gene DMRT1 is required for male sex determination in the chicken. *Nature* **461**: 267-  
480 271.

- 481 Smith, C. A., M. J. Smith, and A. H. Sinclair, (1999) Gene expression during gonadogenesis in  
482 the chicken embryo. *Gene* **234**: 395-402.
- 483 Shirak, A., E. Seroussi, A. Cnaani, A. E. Howe, R. Domokhovsky *et al.*, (2006) Mis and Dmrt2  
484 genes map to tilapia (*Oreochromis* spp.) linkage group 23 within quantitative trait locus  
485 regions for sex determination. *Genetics* **174**: 1573-1581.
- 486 Shoemaker-Daly, C. M., K. Jackson, R. Yatsu, Y. Matsumoto, and D. Crews, (2010) Genetic  
487 network underlying temperature- dependent sex determination is endogenously regulated  
488 by temperature in isolated cultured *Trachemys scripta* gonads. *Dev. Dyn.* **239**: 1061-1075.
- 489 Shoemaker, C., M. Ramsey, J. Queen, and D. Crews, (2007) Expression of Sox9, Mis and Dmrt1  
490 in the gonad of a species with temperature-dependent sex determination. *Dev. Dyn.* **236**:  
491 1055-1063.
- 492 Sun, W., H. Cai, G. Zhang, H. Zhang, H. Bao *et al.*, (2017) Dmrt1 is required for primary male  
493 sexual differentiation in Chinese soft-shelled turtle *Pelodiscus sinensis*. *Sci. Rep.* **7**: 4433.
- 494 Schulz, R. W., J. Bogerd, R. Male, J. Ball, M. Fenske *et al.*, (2007) Estrogen induced alterations  
495 in Mis and Dmrt1 expression signal for disruption in male sexual development in the  
496 zebrafish. *Environ. Sci. Technol.* **41**: 6305-6310.
- 497 Takehana, Y., M. Matsuda, T. Myosho, M. L. Suster, K. Kawakami *et al.*, (2014) Co-option of  
498 Sox3 as the male-determining factor on the Y chromosome in the fish *Oryzias dancena*. *Nat.*  
499 *Commun.* **5**: 4157.
- 500 Tokita, M., and S. Kuratani, (2001) Normal embryonic stages of the Chinese softshelled turtle  
501 *Pelodiscus sinensis* (Trionychidae). *Zool. Sci.* **18**: 705-715.
- 502 Western, P. S., J. L. Harry, J. A. Graves, and A. H. Sinclair, (1999) Temperature-dependent sex

503 determination in the American alligator: MIS precedes SOX9 expression. *Dev. Dyn.* **216**: 411-  
504 419.

505 Wu, G. C., P. C. Chiu, Y. S. Lyu, and C. F Chang, (2010) The expression of Mis and Misr2 is  
506 associated with the development of gonadal tissue and sex change in the protandrous black  
507 porgy, *Acanthopagrus schlegeli*. *Biol. Reprod.* **83**: 443-453.

508 Wang, Z., J. Pascual-Anaya, A. Zadissa, W. Li, Y. Niimura *et al.*, (2013) The draft genomes of  
509 soft-shell turtle and green sea turtle yield insights into the development and evolution of the  
510 turtle-specific body plan. *Nat. Genet.* **45**: 701-706.

511 Yoshimoto, S., E. Okada, H. Umemoto, K. Tamura, Y. Uno *et al.*, (2008) A W-linked DM-domain  
512 gene, DM-W, participates in primary ovary development in *Xenopus laevis*. *Proc. Natl. Acad.*  
513 *Sci. USA.* **105**: 2469-2474.

514 Yano, A., R. Guyomard, B. Nicol, E. Jouanno, E. Quillet *et al.*, (2012) An immune-related gene  
515 evolved into the master sex-determining gene in rainbow trout, *Oncorhynchus mykiss*. *Curr.*  
516 *Biol.* **22**: 1423-1428.

517 Yoshinaga, N., E. Shiraishi, T. Yamamoto, T. Iguchi, S. Abe *et al.*, (2004) Sexually dimorphic  
518 expression of a teleost homologue of Müllerian inhibiting substance during gonadal sex  
519 differentiation in Japanese flounder, *Paralichthys olivaceus*. *Biochem. Biophys. Res. Commun.*  
520 **322**: 508-513.

## FIGURE LEGENDS

Figure 1

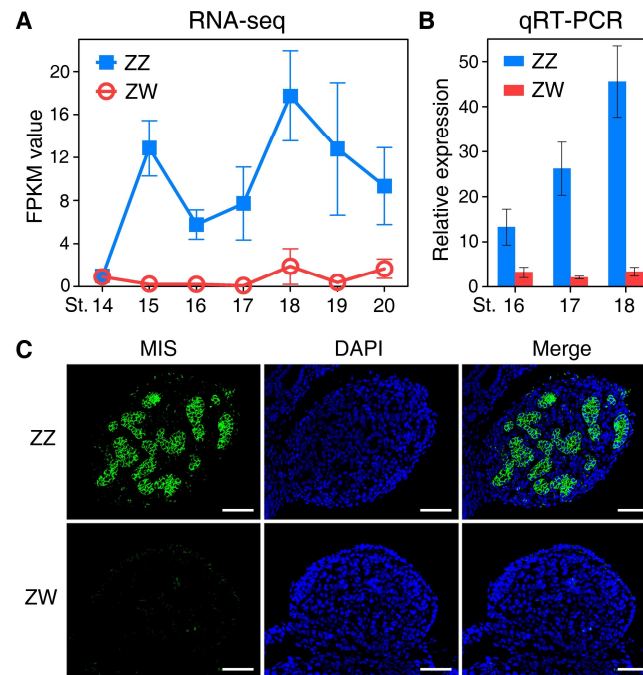

**Figure 1. The sexually dimorphic expression of *Mis* in early embryonic gonads of *P. sinensis*.** (A, B) The transcript expression levels of *Mis* in gonads of both sexes during the critical sex determination period (stage 15-19), determined by RNA-seq (A) and qRT-PCR (B). *Mis* exhibited a highly male-specific expression pattern in early embryonic gonads. Data are shown as means  $\pm$  S.D.  $N \geq 3$ . (C) Immunofluorescence of MIS in male and female embryonic gonads at stage 17. MIS protein was robustly expressed in the medullary region of ZZ gonads. Scale bars are 50  $\mu$ m.

**Figure 2**

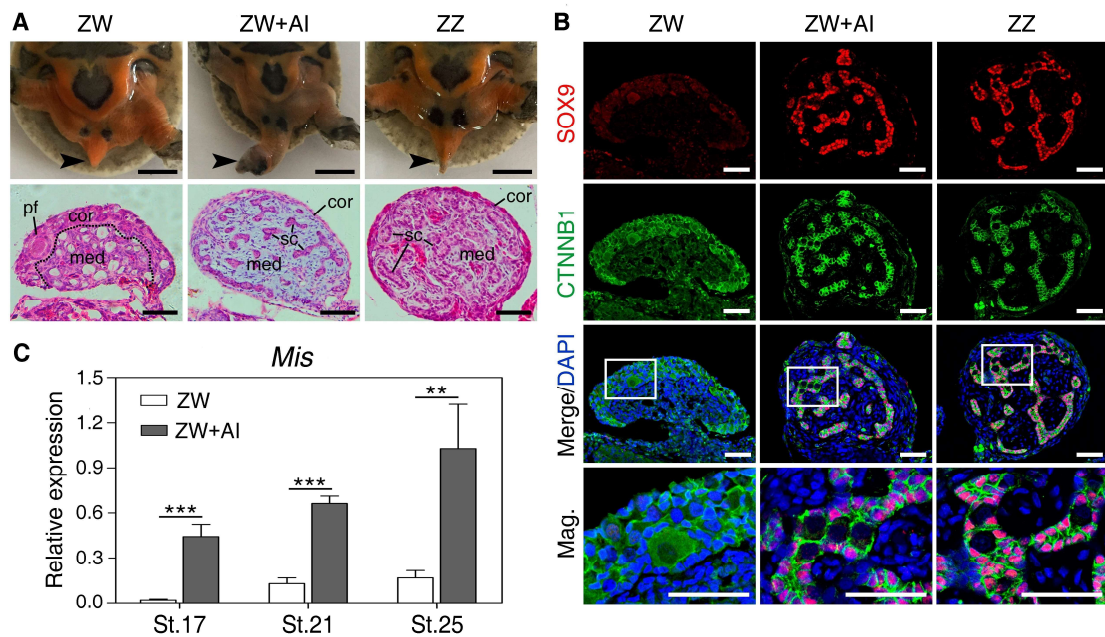

**Figure 2. Upregulation of *Mis* in masculinized ZW gonads induced by aromatase**

**inhibitor (AI).** (A) Tail morphology (black arrow) and Hematoxylin and Eosin (H&E)

staining of gonadal sections from control ZW, ZW+AI and control ZZ *P. sinensis* of

stage 27. The male-to-female sex reversal were observed in ZW+AI gonads

characterized by morphologically altered tail and medullary sex-cord formation. sc,

sertoli cell; pf, primordial follicle; cor, cortical region; med, medullary region. Scale

bars are 5 mm and 50  $\mu$ m, respectively. (B) Double immunofluorescence of SOX9 and

CTNNB1 in gonadal sections of control ZW, ZW+AI and control ZZ *P. sinensis* of stage

27. Ectopic expression of SOX9 protein were activated in masculinized medulla of ZW

gonads. Scale bars are 50  $\mu$ m. (C) The mRNA expression of *Mis* in ZW gonads with AI

treatment at stage 17, 21 and 25, showing rapid and remarkable up-regulation,

determined by qRT-PCR analysis. Data are shown as means  $\pm$  S.D. N $\geq$ 3. \*\*,  $P < 0.01$ ;

\*\*\*,  $P < 0.001$ .

**Figure 3**

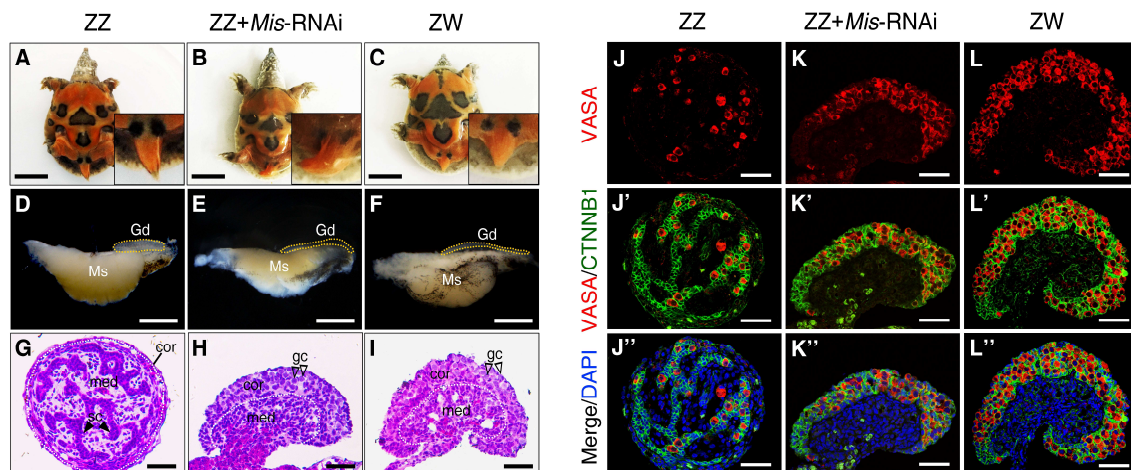

**Figure 3. Feminization of ZZ embryos following *Mis* knockdown *in ovo*. (A-C)**

Morphology of tails from control ZZ, ZZ+*Mis*-RNAi and control ZW *P. sinensis* of stage 27. Scale bars are 1 cm. (D-F) Representative images of the gonad-mesonephros complexes (GMCs) from control ZZ, ZZ+ *Mis*-RNAi and control ZW embryos of stage 25. The ZZ gonads with *Mis* knockdown became elongated and flat, compared to control ZZ gonads. Gonads were outlined by yellow dotted lines. Gd, gonad; Ms, mesonephros. Scale bars are 1 mm. (G-I) H&E staining of gonadal sections from control ZZ, ZZ+*Mis*-RNAi and control ZW embryos of stage 25. The ZZ gonads with *Mis* knockdown appeared thickened outer cortex and degenerated testis cord in medullary region, similar to control ZW gonads. The white dotted lines showed the separation between cortical and medullary regions. sc, sertoli cell; gc, germ cells; cor, cortical region; med, medullary region. Scale bars are 50  $\mu$ m. (J-L'') VASA and CTNNB1 immunostaining of gonadal sections from control ZZ, ZZ+*Mis*-RNAi and control ZW embryos of stage 25. A female-typical distribution pattern of germ cells was observed in *Mis* deficient ZZ gonads. Scale bars are 50  $\mu$ m.



**Figure 4**

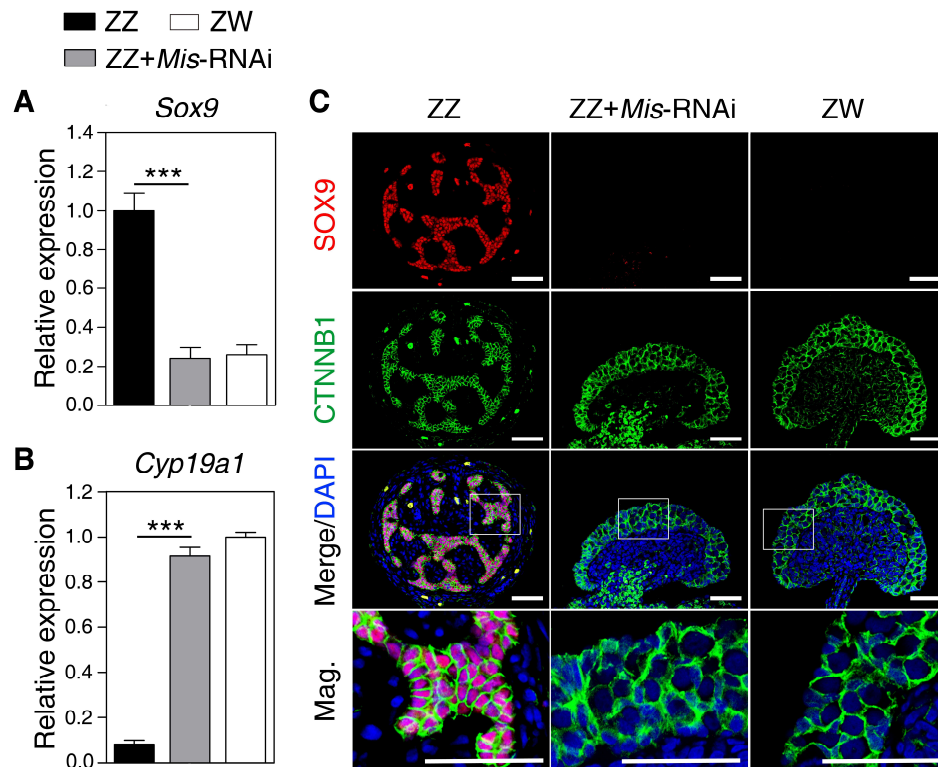

**Figure 4. The *Sox9* and *Cyp19a1* expression change in response to *Mis* knockdown.**

(A, B) qRT-PCR of *Sox9* and *Cyp19a1* in control ZZ, ZZ+*Mis*-RNAi and control ZW gonads of stage 25, showing significantly reduced *Sox9* expression and increased *Cyp19a1* expression in *Mis* deficient ZZ gonads. Data are shown as means  $\pm$  S.D.  $N \geq 3$ . \*\*\*,  $P < 0.001$ . (C) Double immunofluorescence of SOX9 and CTNNB1 in sections of control ZZ, ZZ+*Mis*-RNAi and control ZW gonads of stage 25. SOX9 protein expression almost disappeared in *Mis* deficient ZZ gonads. Scale bars are 50  $\mu$ m.



**Figure 5**

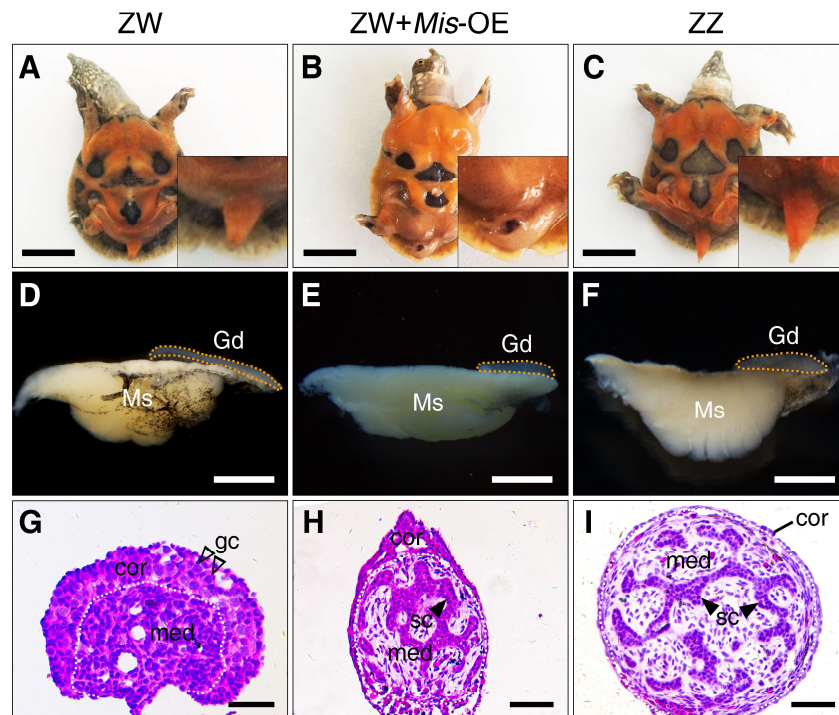

**Figure 5. Masculinization of ZW embryos overexpressing *Mis in ovo*.** The tails (A-C), GMCs (D-F) and H&E staining of gonadal sections (G-I) from control ZW, ZW+*Mis*-OE and control ZZ embryos. The ZW embryos overexpressing *Mis* showed the female-to-male sex reversal, characterized by curved tails and male-like gonads with seminiferous cord-like structure in medulla. Gd, gonad; Ms, mesonephros; sc, sertoli cell; gc, germ cells; cor, cortical region; med, medullary region. Scale bars are 1 cm (A-C), 1 mm (D-F) and 50  $\mu$ m (G-I), respectively.

**Figure 6**

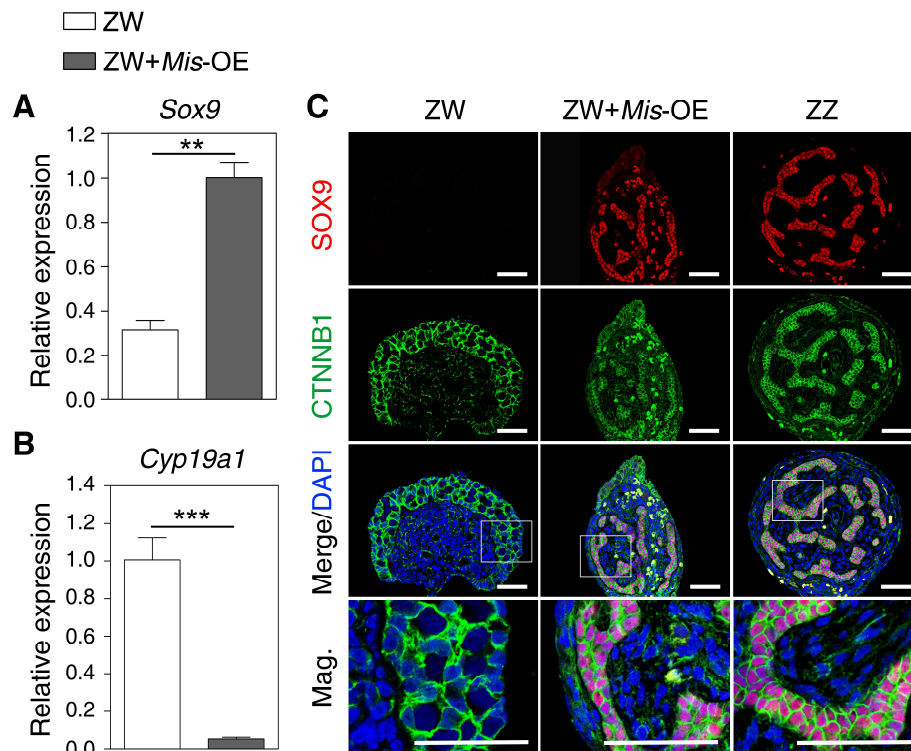

**Figure 6. The *Sox9* and *Cyp19a1* expression change in response to *Mis***

**overexpression.** (A, B) qRT-PCR of *Sox9* and *Cyp19a1* in control ZW, ZW+*Mis*-OE and control ZZ gonads of stage 25, showing increased *Sox9* expression and reduced *Cyp19a1* expression in ZW gonads overexpressing *Mis*. Data are shown as means  $\pm$  S.D.  $N \geq 3$ . \*\*,  $P < 0.01$ ; \*\*\*,  $P < 0.001$ . (C) Double Immunofluorescence of SOX9 and CTNNB1 in sections of control ZW, ZW+*Mis*-OE and control ZZ gonads of stage 25. SOX9 protein was induced to express robustly in gonadal medulla of ZW embryos overexpressing *Mis*. Scale bars are 50  $\mu\text{m}$ .

**Table 1**

Phenotypes of embryos with knockdown or overexpression of *Mis*

| Viral treatment       | No. of injected embryos | Embryos surviving until stage 25 | Genotype of embryos | Phenotype of embryos | sex reversal rate* |
|-----------------------|-------------------------|----------------------------------|---------------------|----------------------|--------------------|
| LV-NC-shRNA           | 200                     | 175                              | ZZ:88; ZW:87        | M:88; F:87           | 0/88               |
| LV- <i>Mis</i> -shRNA | 200                     | 138                              | ZZ:64; ZW:74        | M:43; F:95           | 21/64              |
| LV-empty              | 200                     | 150                              | ZZ:78; ZW:72        | M:78; F:72           | 0/72               |
| LV- <i>Mis</i> -OE    | 200                     | 124                              | ZZ:62; ZW:62        | M:78; F:46           | 16/62              |

Genotype of embryos was identified by amplification of sex chromosome-specific DNA fragment.

Phenotype of embryos was assessed by gonadal histology, and SOX9 immunofluorescence.

\*Male-to-female sex reversal rate=No. of feminized genetic male embryos/total No. of ZZ embryos; female-to-male sex reversal rate=No. of masculinized genetic female embryos/total No. of ZW embryos.





**Figure S1. Sequence and phylogenetic analyses of *P. sinensis*.** (A) The complete cDNA sequence of *P. sinensis* *Mis* and deduced amino acid sequence. The start codon ATG was underlined, and the stop codon was indicated by an asterisk. (B) Alignment of amino acid sequence of *P. sinensis* MIS with those from other typical species. The two characteristic functional domains of the TGF- $\beta$  superfamily, AMH-N and TGF- $\beta$  domain, were marked. (C) MIS phylogenetic tree from *P. sinensis* and other typical species based on Neighbor-Joining (N-J) method. Numbers at branches were confidence values based on 1000 bootstraps. Each branch length scale in terms of genetic distance was indicated above the tree.

**Figure S2**

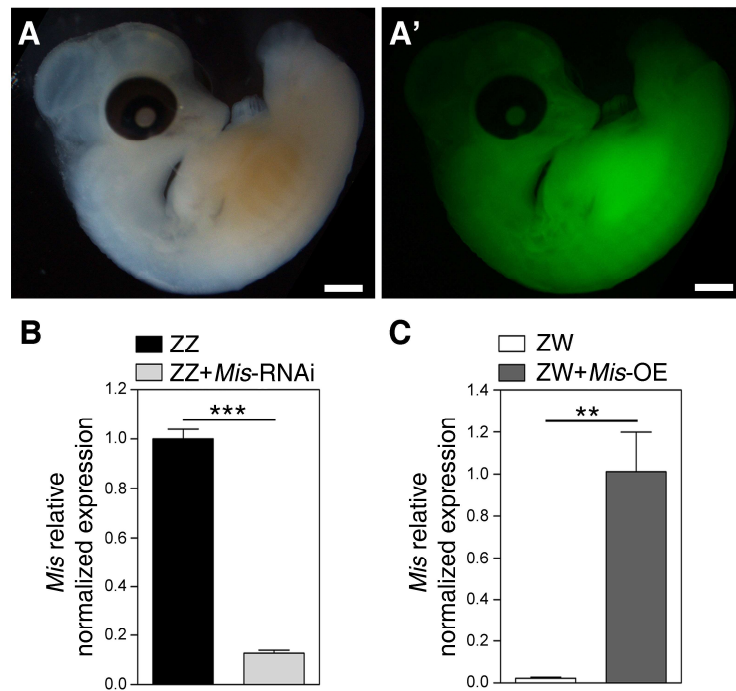

**Figure S2. Establishment of *Mis*-Knockdown and -overexpressing turtle model using lentivirus vectors.** (A, A') The whole embryos of stage 15 infected with scrambled lentiviral vector (LV-NC) at stage 14 showed widespread GFP expression. Bright (A) and epifluorescence (A') images. Scale bars are 1 mm. (B, C) qRT-PCR of *Mis* showed >80% downregulation in ZZ gonads with LV-*Mis*-shRNA treatment (B) and >50-fold upregulation in ZW gonads with LV-*Dmrt1*-OE treatment (C), respectively. Data are shown as means  $\pm$  S.D.  $N \geq 3$ . \*\*,  $P < 0.01$ ; \*\*\*,  $P < 0.001$ .

### Figure S3

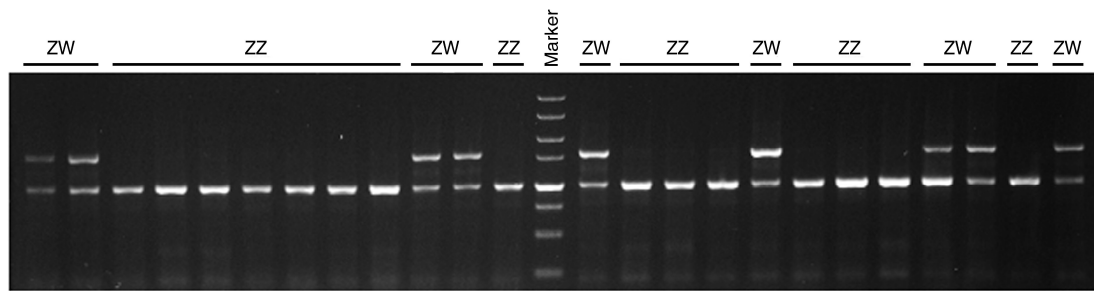

**Figure S3. Sex-diagnostic amplification in *Pelodiscus sinensis*.** Lower bands represent Z-linked amplified fragments, and higher bands represent W-linked sex-diagnostic fragments. One- and two-band indicated genetic male (ZZ) and female (ZW), respectively.
